# Supplementary material
Source: publisher figshare collection journal article supplement (https://acs.figshare.com/ndownloader/files/4005007)
Supplement: Supplementary file 1 [file 4005007]

## Supporting Information

# **Controlled Fabrication of Iron Oxides/Mesoporous Silica Core-Shell Nanostructures**

**Mingwei Zhang<sup>1,2</sup>, Kegong Fang<sup>1</sup>, Minggui Lin<sup>1</sup>, Bo Hou<sup>1</sup>, Liangshu Zhong<sup>3</sup>, Yan Zhu<sup>3</sup>, Wei Wei<sup>3\*</sup>,**

**Yuhan Sun<sup>1,3\*</sup>**

1 State Key Laboratory of Coal Conversion, Shanxi Institute of Coal Chemistry, Chinese Academy of  
Sciences, Taiyuan, Shanxi 030001, P.R. China

2 Graduate University of Chinese Academy of Science, Beijing 100039, P.R. China

3 CAS Key Laboratory of Low-Carbon Conversion Science and Engineering, Shanghai Advanced Research  
Institute, Chinese Academy of Sciences, Shanghai 201203, P.R. China

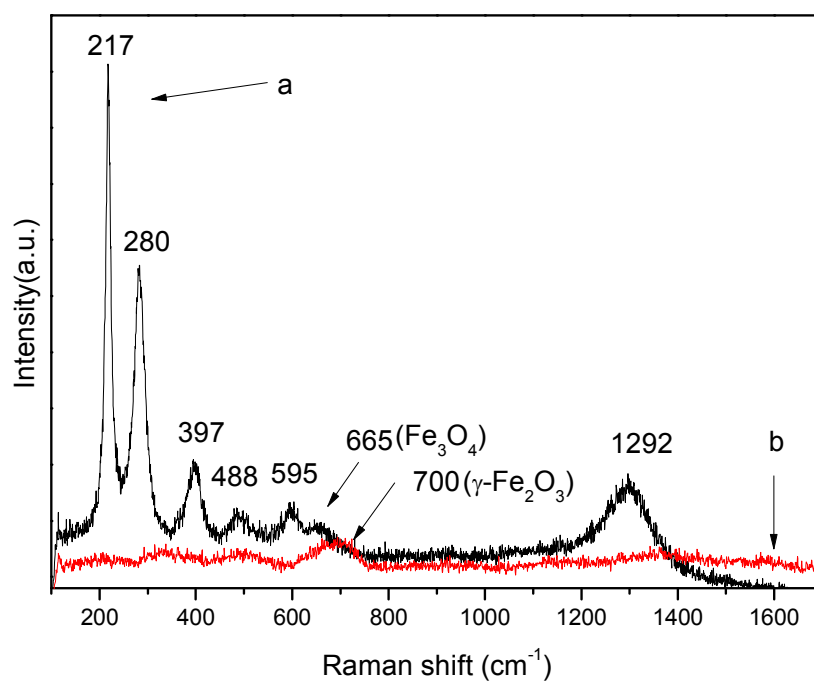

Figure S1. (a) Raman spectrum of the as-synthesized iron oxides sample; (b) Raman spectrum of the core-shell structure after calcination.

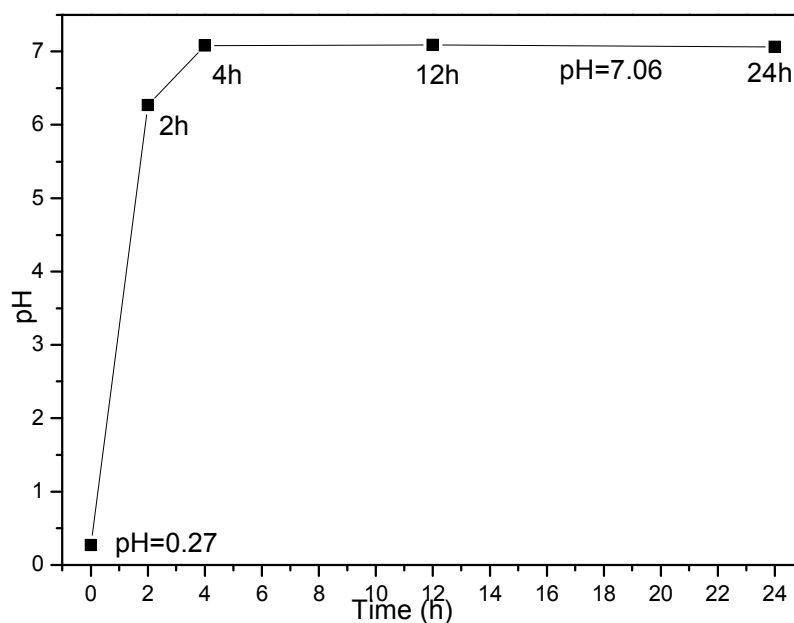

Figure S2. The variation of the pH value in nanocube synthesis process (the pH value variation of other samples with 0.5 mL and 3 mL acetic acid addition are similar to this)

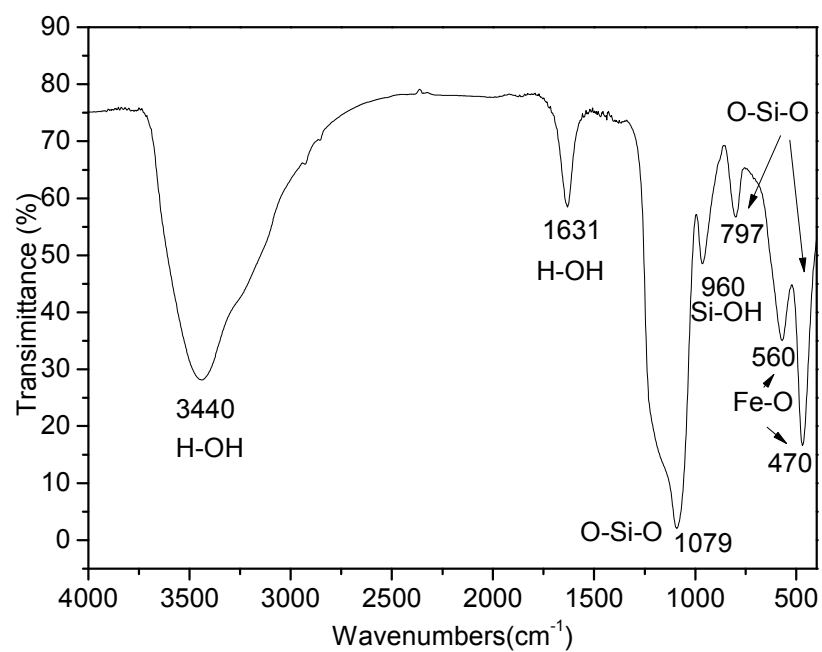

Figure S3. FT-IR absorption spectra of the Fe<sub>2</sub>O<sub>3</sub>@SiO<sub>2</sub> core-shell nanoparticles after calcination at 550 °C.

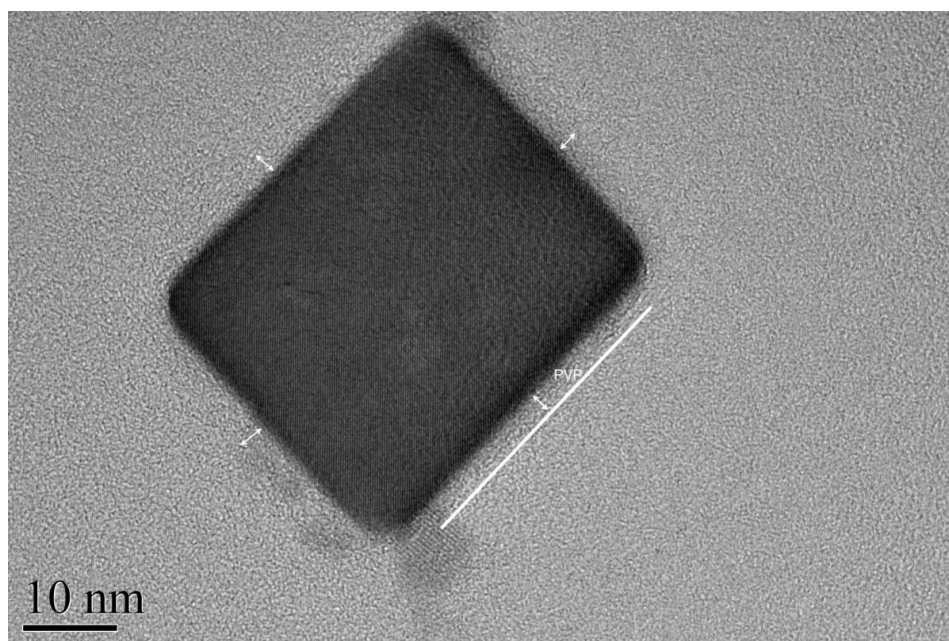

Figure S4. TEM image of an individual iron oxides nanocube coated with PVP.

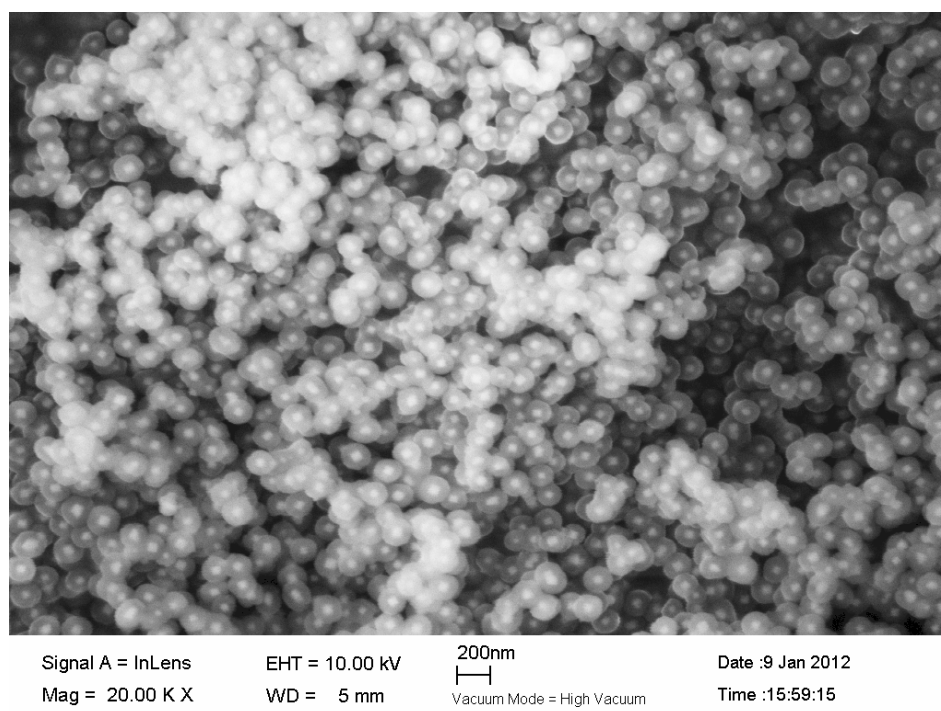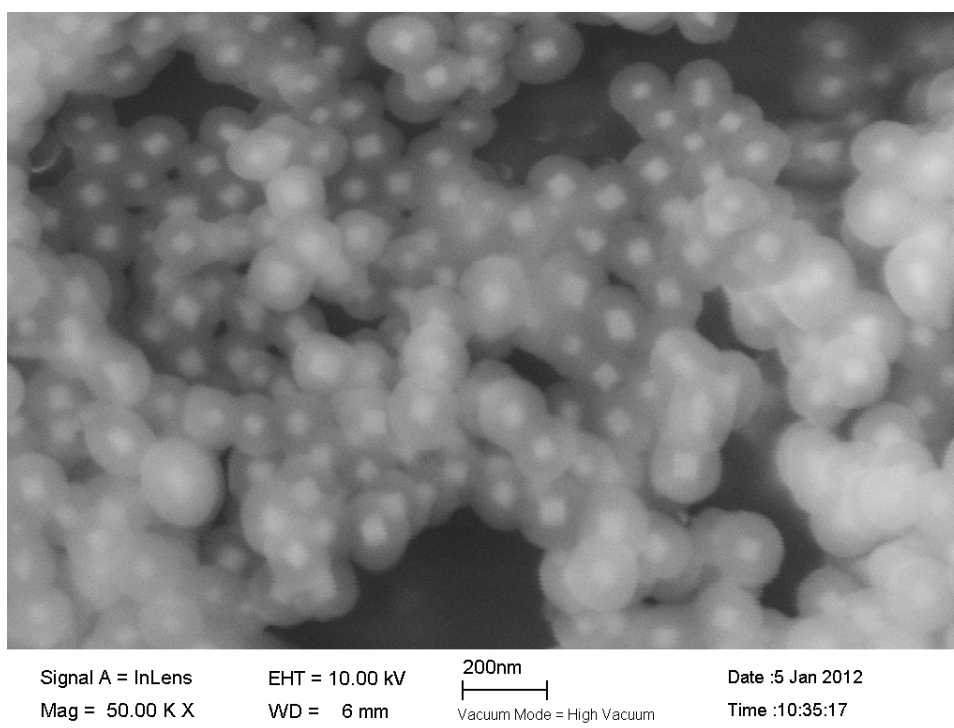

Figure S5. Backscattered electrons images of  $\text{Fe}_2\text{O}_3@\text{SiO}_2$  core-shell structure with cubic core morphology.

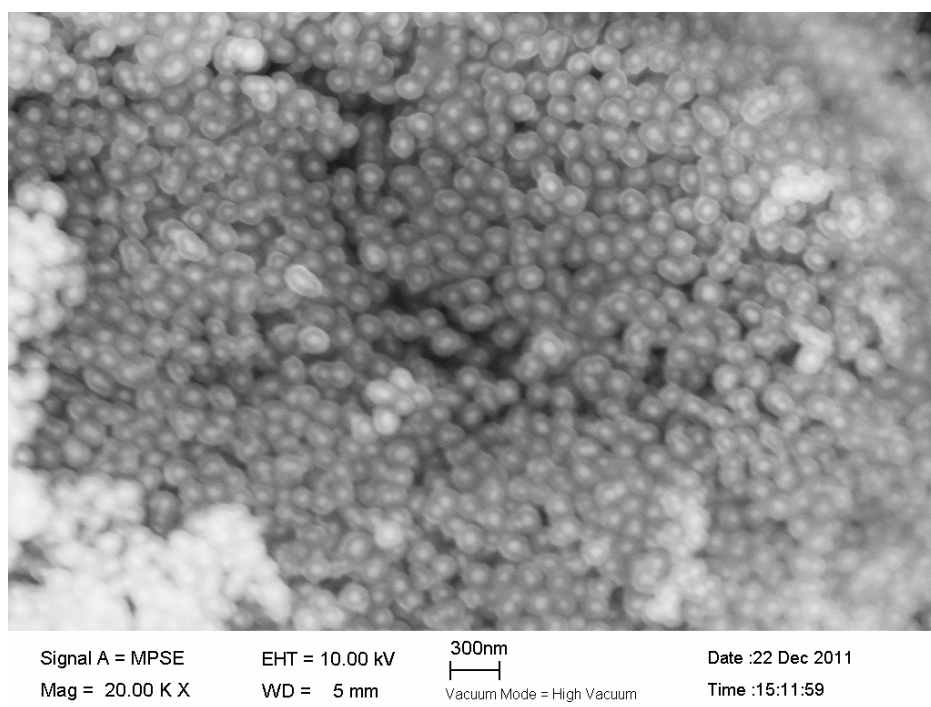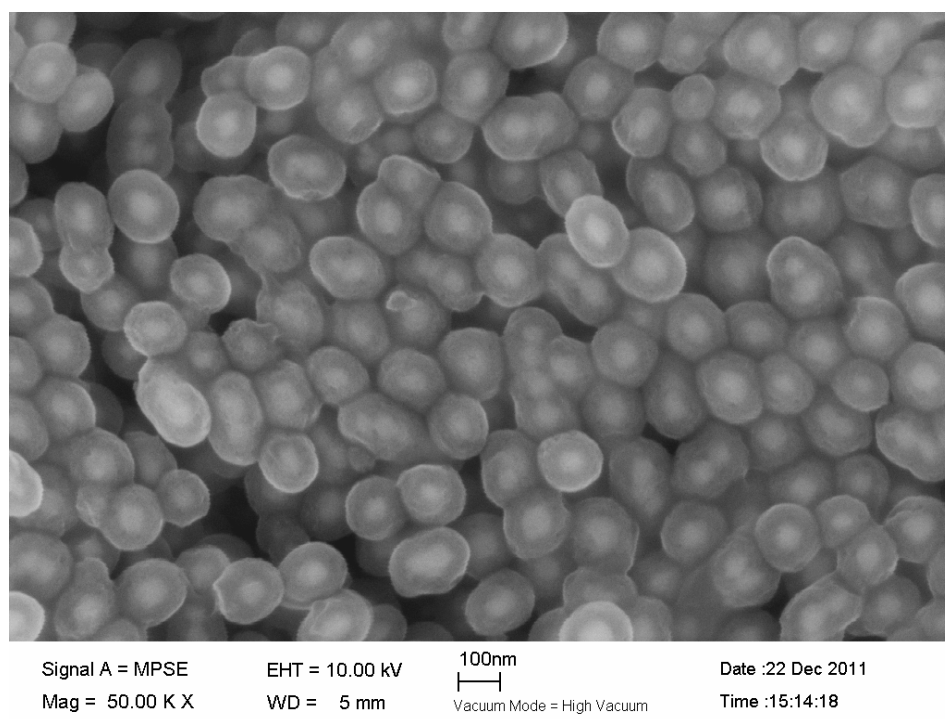

Figure S6. Backscattered electrons images of  $\text{Fe}_2\text{O}_3@\text{SiO}_2$  core-shell structure with spherical core morphology.

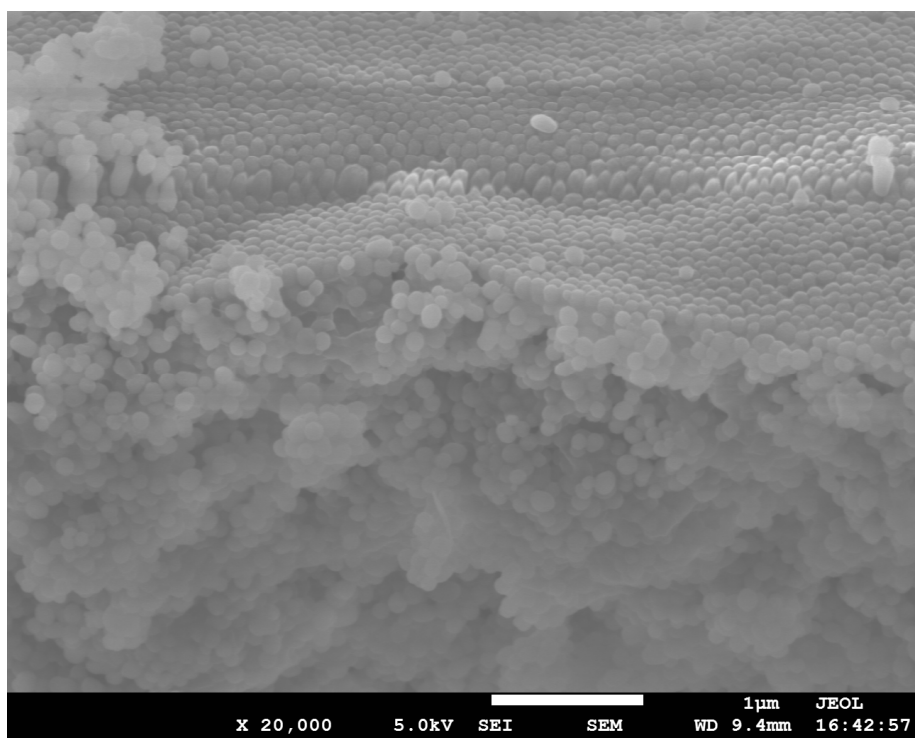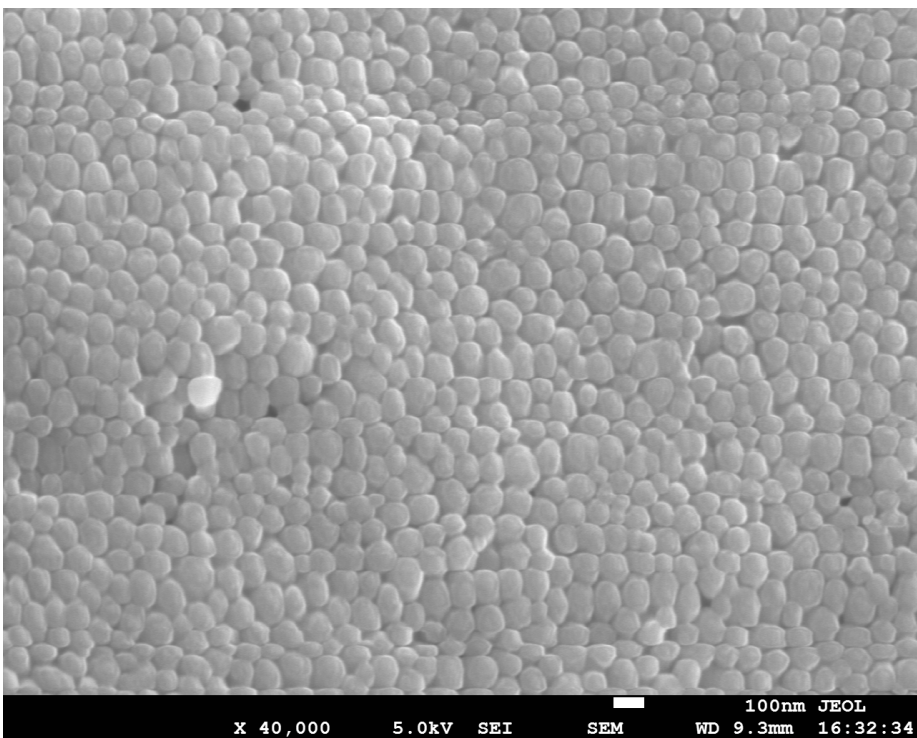

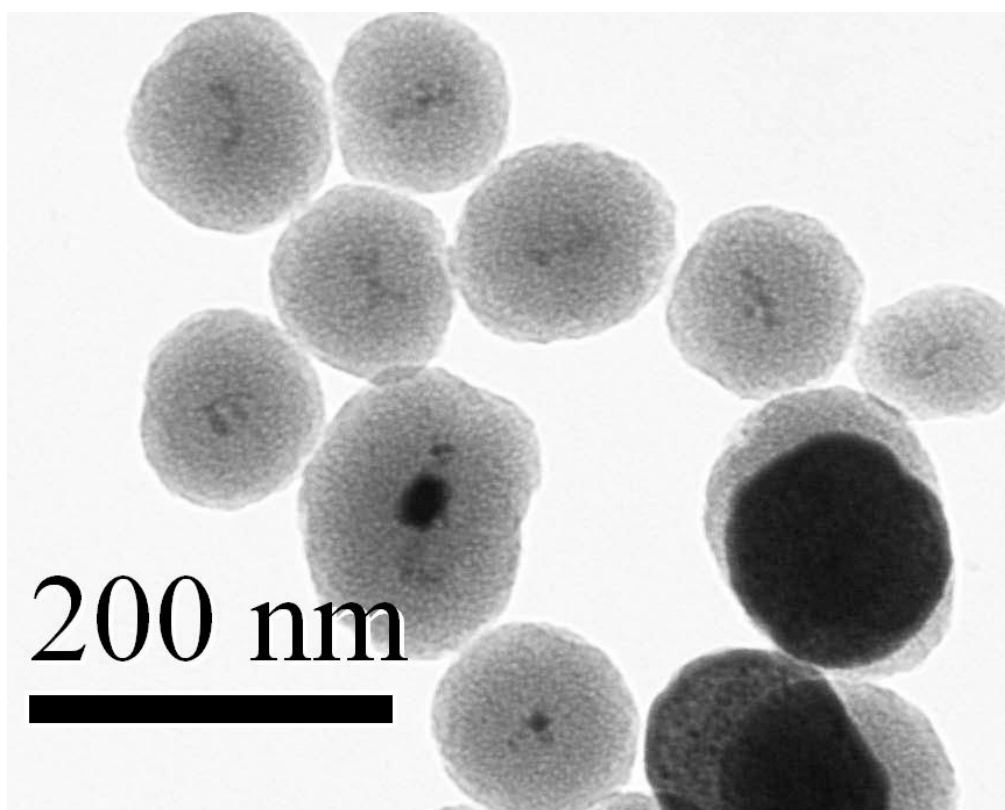

Figure S7. SEM and TEM images of Fe<sub>2</sub>O<sub>3</sub>@SiO<sub>2</sub> core-shell structure with iron oxides size of ~6 nm.
